# Supplementary material
Source: PubMed Central journal article supplement (PMC7458813)
Supplement: supp_RA120.014317_160777_2_supp_562217_qd71th.pdf [file supp_RA120.014317_160777_2_supp_562217_qd71th.pdf]

Supplementary Information for

**Extracellular vesicles secreted by HBV-infected cells modulate HBV persistent in hydrodynamic HBV transfection mouse model**

**Masatoshi Kakizaki<sup>1,2</sup>, Yuichiro Yamamoto<sup>2</sup>, Motoyuki Otsuka<sup>3</sup>, Kouichi Kitamura<sup>4</sup>, Masatoshi Ito<sup>5</sup>, Hideki Derek Kawai<sup>6</sup>, Masamichi Muramatsu<sup>4</sup>, Tatehiro Kagawa<sup>7</sup> and Ai Kotani<sup>1,2\*</sup>.**

From the <sup>1</sup>Department of Innovative Medical Science, Tokai University School of Medicine, Kanagawa, 259–1193, Japan; <sup>2</sup>Division of Hematological Malignancy, Institute of Medical Sciences, Tokai University, Kanagawa, 259–1193, Japan; <sup>3</sup>Department of Gastroenterology, Graduate school of Medicine, The University of Tokyo, Tokyo, 113-8655, Japan; <sup>4</sup>Department of Virology II, National Institute of Infectious Diseases, Tokyo, 162-8640, Japan; <sup>5</sup>Support Center for Medical Research and Education, Tokai University School of Medicine, Kanagawa, 259-1193, Japan; <sup>6</sup>Department of Science and Engineering for Sustainable Innovation, Faculty of Science and Engineering, Soka University, Hachioji, Tokyo, 192-8577, Japan; <sup>7</sup>Division of Gastroenterology and Hepatology, Department of Internal Medicine, Tokai University School of Medicine, Kanagawa, 259-1193, Japan

\*To whom correspondence should be addressed: Ai Kotani, Department of Hematological Malignancy, The Institute of Medical Sciences, Tokai University, Department of Innovative Medical Science, Tokai University School of Medicine, 143 Shimokasuya, Isehara, Kanagawa, 259-1193, Japan; aikotani@k-lab.jp; Tel. 81.463-93-1121 ext. 2781,

**This PDF file includes:**

Figures S1 to S6

**Fig S1 Characterization of EVs isolated from healthy donor and HBV patient**

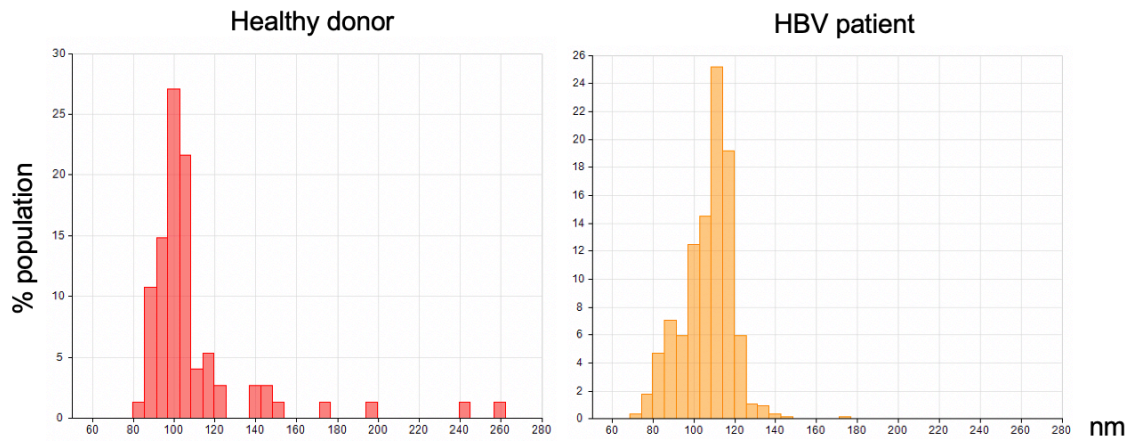

qNano analysis of EVs isolated from healthy donor and HBV patient.

**Fig S2. HBcAg expression in the liver of mouse treated with only patient EVs.**

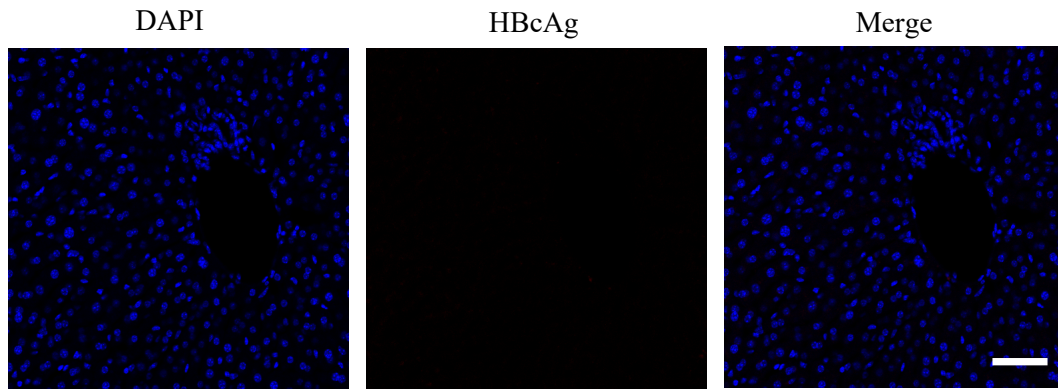

Immunofluorescence of mouse liver sections obtained 3 days after injection of only patient 4 EVs. Sections were stained to detect HBcAg (Red) and nuclei using DAPI (Blue). White bar indicate 50  $\mu\text{m}$ .

**Fig S3. Ratio of CD3+ T cells in liver-draining LN and spleen after injection of EVs from healthy donor and HBV patient.**

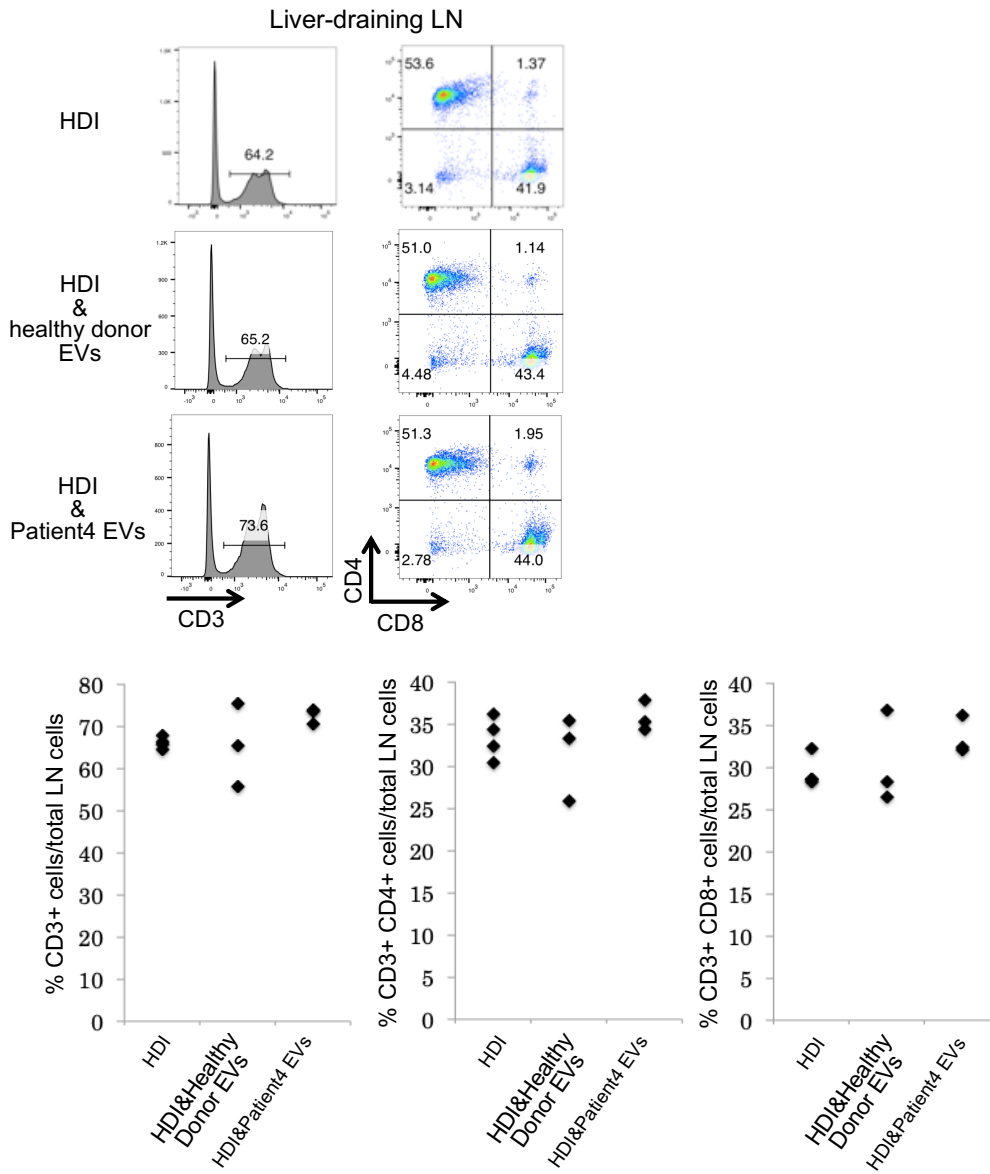

Cells from liver-draining LN and spleen were isolated 3 days after HDI and analyzed. The frequencies of CD3+ CD4+ T cells and CD3+ CD8+ T cells in mice treated with HDI alone, HDI and healthy donors EVs, and HDI and HBV patients EVs were detected by flow cytometry (top) and plotted in a graphic (bottom).

**Fig S4. Ratio of B220+ B cells in liver-draining LN after injection of EVs from healthy donor and HBV patient.**

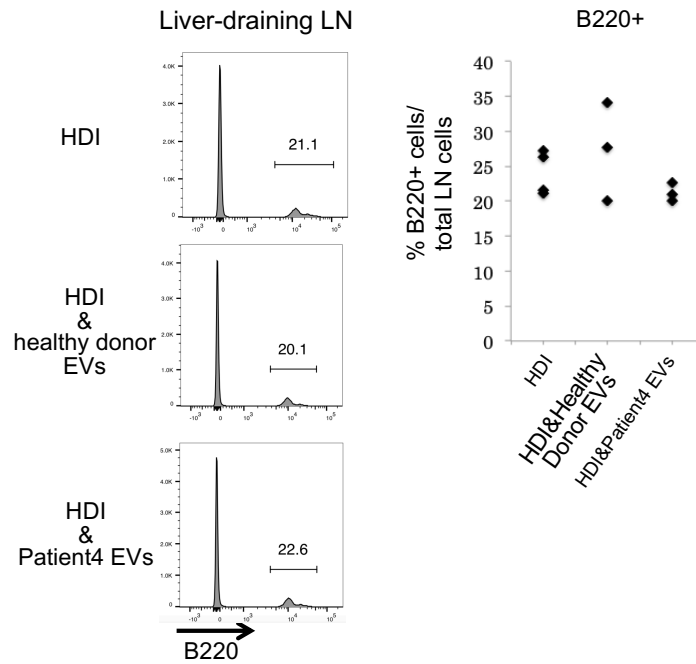

Cells from liver-draining LN were isolated 3 days after HDI and analyzed. The frequencies of B220+ B cells in mice treated with HDI alone, HDI and healthy donors EVs, and HDI and HBV patients EVs were detected by flow cytometry (left) and plotted in a graphic (right).

**Fig S5. PD-L1 expression in CD3+ T cells and B220+ B cells of liver-draining LN after injection of EVs from HBV patient.**

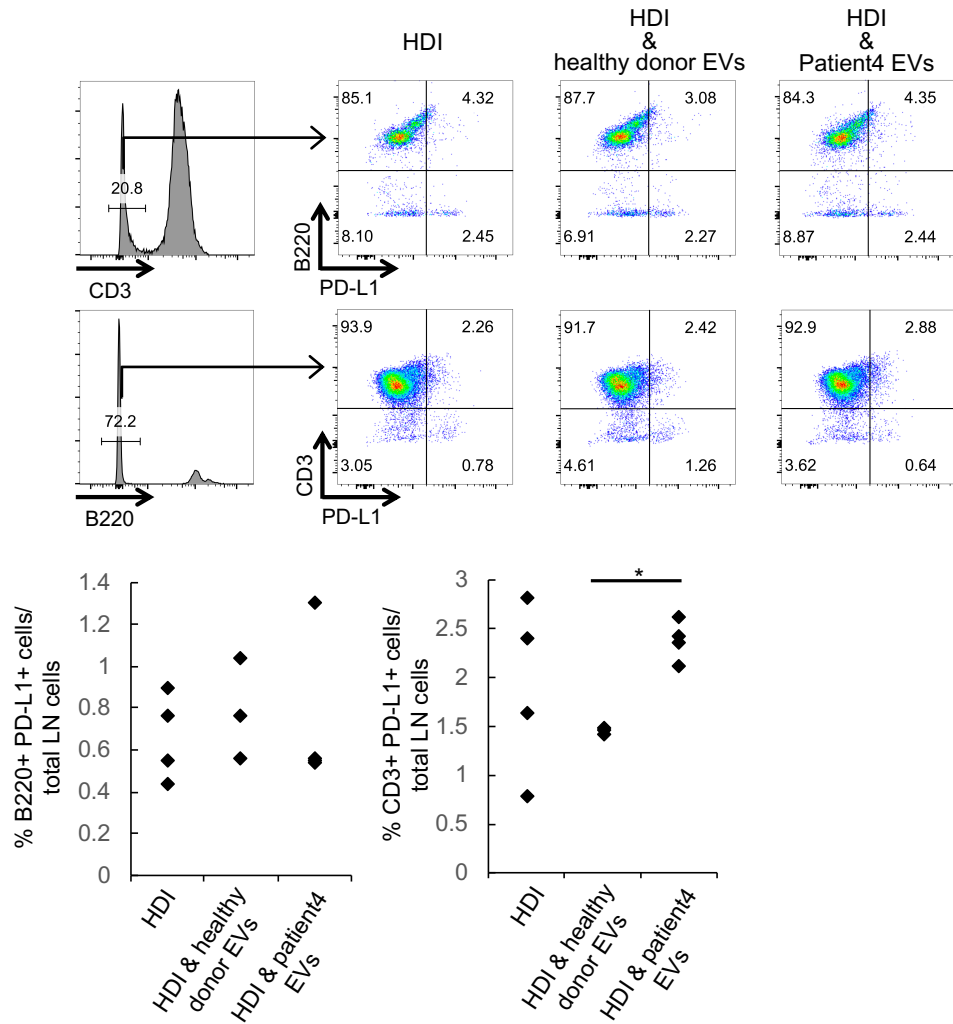

Cells from liver-draining LN were isolated 3 days after HDI and analyzed. The frequencies of B220+ PD-L1+ cells and CD3+ PD-L1+ cells in mice treated with HDI alone, HDI and healthy donors EVs, and HDI and HBV patients EVs were detected by flow cytometry (top) and plotted in a graphic (bottom).

**Fig S6. Systemic biodistribution of the EVs derived from HBV-infected cells.**

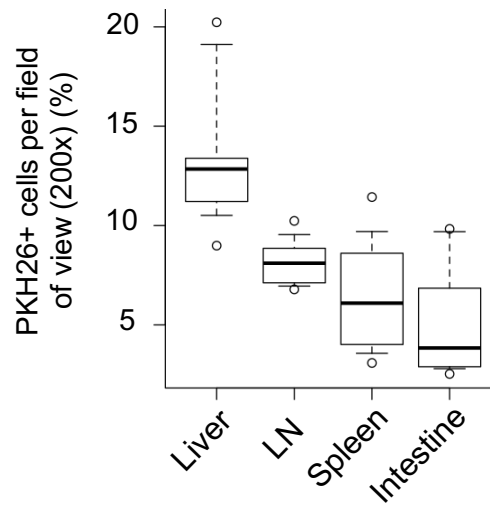

PKH-26 labeled EVs secreted from HBV-infected cells were injected in the tail vein of mice, and after 24 hours, cryosections were prepared for liver, liver-draining LNs, spleen and intestine and observed with a confocal laser microscopy. PKH-26 positive cells were counted in 15 fields from 3 mice. Ratio to total cells were calculated.
